# Supplementary material
Source: publisher site journal article supplement (https://www.dovepress.com/article/363997)
Supplement: Supplementary file 1 [file get_supplementary_file.php]

# Supplementary Appendices

## Supplementary Appendix A: Exposure Categories

| **Mutually exclusive time-at-risk categories** | | |
| --- | --- | --- |
| **Current Use**  Period during which patients appeared to be using the drugs based on days’ supply (main exposure of interest)  Current use was defined as the sum of episodes of continuous use. The first episode of continuous use started at the start date and ended at the end of follow-up or 7 days after the end of days’ supply of the earlier prescription when a gap of more than 7 days between the end of one prescription and the beginning of the next one occurred  Current use was further classified according to the time at risk for each of the study medications in the two mutually exclusive categories: current single use and current multiple use |  | Current single use  Current single use was defined as a patient’s current use of one single medication group |
|  | Current multiple use  Current multiple use was defined as a patient’s current use of more than one study medication group |
| **Recent Use**  Recent use started at the end of the current use episode (not including the 7-day extension period) and ended at the earliest of: (1) the beginning of a new episode of current use, (2) end of follow-up, or (3) 60 days after the end of the current use episode. | | |
| **Past Use**  Past use started after recent use ended, i.e., 61 days after the end of the current use episode (which includes the 7-day extension period) and ended the earliest of (1) the beginning of a new episode of current use or (2) end of follow-up. | | |
| Examples of current, recent, and past use definition scenarios:  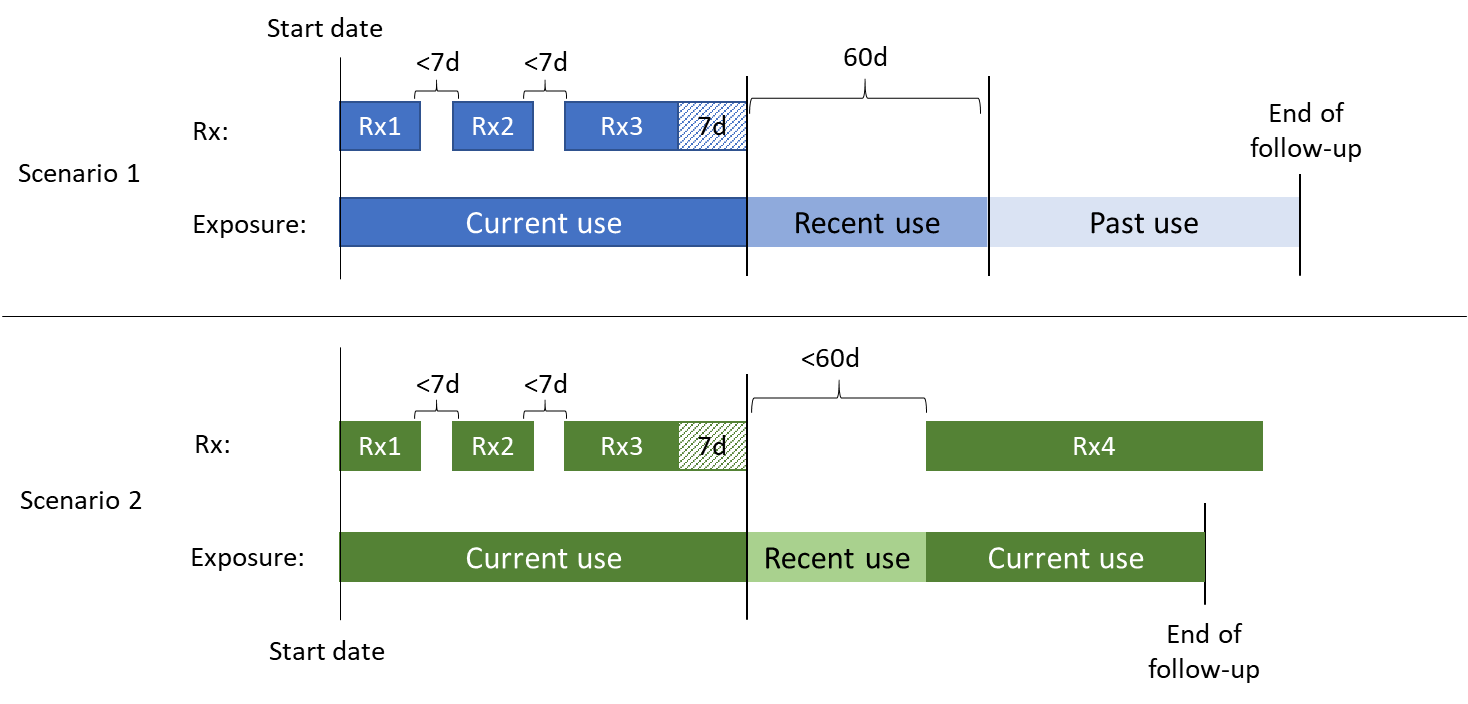 | | |
| **Duration of current use categories** | | |
| **Short Duration of Current Use**  Duration of use was classified as short duration if the sum of continuous use episodes was shorter than 6 months | | |
| **Long Duration of Current Use**  Duration of use was classified as long duration if the sum of continuous use episodes was 6 months or longer  Time at risk for long-duration use started after 6 months of current use | | |

## Supplementary Appendix B: Duration of Current Use of Each Study Medication, in Months

| **Overall/Short/Long** | **AMI** | | | **Stroke** | | |
| --- | --- | --- | --- | --- | --- | --- |
| **N** | **Mean (SD)** | **Median [Q1, Q3]** | **N** | **Mean (SD)** | **Median [Q1, Q3]** |
| **Aclidinium** | 11,121 | 15.00 (15.66) | 9.07 [2.20, 23.44] | 11,121 | 15.00 (15.66) | 9.07 [2.20, 23.44] |
| Short duration | 11,121 | 4.47 (2.02) | 6.00 [2.20, 6.00] | 11,121 | 4.47 (2.02) | 6.00 [2.20, 6.00] |
| Long duration | 6,493 | 18.03 (14.92) | 14.35 [5.77, 26.82] | 6,487 | 18.05 (14.92) | 14.38 [5.80, 26.83] |
| **Aclidinium/formoterol** | 4,804 | 9.82 (9.74) | 5.98 [2.20, 15.01] | 4,804 | 9.83 (9.75) | 6.01 [2.20, 15.07] |
| Short duration | 4,804 | 4.20 (2.08) | 5.98 [2.20, 6.00] | 4,804 | 4.21 (2.08) | 6.00 [2.20, 6.00] |
| Long duration | 2,399 | 11.23 (8.81) | 9.02 [4.09, 16.83] | 2,403 | 11.25 (8.83) | 9.06 [4.09, 16.82] |
| **Tiotropium** | 56,198 | 18.23 (18.25) | 11.62 [3.42, 27.94] | 56,198 | 18.25 (18.26) | 11.66 [3.42, 27.95] |
| Short duration | 56,198 | 4.80 (1.87) | 6.00 [3.42, 6.00] | 56,198 | 4.80 (1.87) | 6.00 [3.42, 6.00] |
| Long duration | 36,476 | 20.70 (17.53) | 15.76 [6.21, 31.58] | 36,513 | 20.70 (17.54) | 15.77 [6.20, 31.58] |
| **Other LAMA** | 23,856 | 13.49 (13.36) | 9.21 [2.99, 19.97] | 23,856 | 13.48 (13.35) | 9.21 [2.99, 19.96] |
| Short duration | 23,856 | 4.64 (1.93) | 6.00 [2.99, 6.00] | 23,856 | 4.64 (1.93) | 6.00 [2.99, 6.00] |
| Long duration | 14,411 | 14.64 (12.84) | 11.23 [4.95, 20.66] | 14,419 | 14.62 (12.82) | 11.23 [4.95, 20.66] |
| **LAMA/LABA** | 17,450 | 10.33 (9.98) | 6.71 [2.40, 15.45] | 17,450 | 10.33 (9.98) | 6.72 [2.40, 15.45] |
| Short duration | 17,450 | 4.42 (1.99) | 6.00 [2.40, 6.00] | 17,450 | 4.42 (1.99) | 6.00 [2.40, 6.00] |
| Long duration | 9,283 | 11.12 (9.30) | 8.70 [3.60, 16.49] | 9,281 | 11.12 (9.30) | 8.70 [3.60, 16.49] |
| **LABA/ICS** | 70,289 | 20.17 (18.31) | 14.50 [4.67, 31.14] | 70,289 | 20.19 (18.32) | 14.52 [4.70, 31.19] |
| Short duration | 70,289 | 5.05 (1.70) | 6.00 [4.67, 6.00] | 70,289 | 5.06 (1.70) | 6.00 [4.70, 6.00] |
| Long duration | 49,840 | 21.32 (17.21) | 17.15 [6.99, 32.31] | 49,894 | 21.33 (17.22) | 17.13 [6.99, 32.32] |
| **LABA** | 13,716 | 11.97 (13.79) | 6.37 [2.20, 16.87] | 13,716 | 11.97 (13.76) | 6.37 [2.20, 16.90] |
| Short duration | 13,716 | 4.29 (2.02) | 6.00 [2.20, 6.00] | 13,716 | 4.30 (2.02) | 6.00 [2.20, 6.00] |
| Long duration | 7,069 | 14.89 (14.23) | 10.40 [4.06, 21.48] | 7,072 | 14.88 (14.20) | 10.41 [4.09, 21.47] |

AMI = acute myocardial infarction; ICS = inhaled corticosteroids; LABA = long-acting beta2-agonist; LAMA = long-acting anticholinergic; Q1 = 1st quartile; Q3 = 3rd quartile; SD = standard deviation.

Note: Short duration of current use is defined as current use shorter than or equal 6 months of the specific study medication. If the total duration of current use is longer than 6 months, the first 6 months of current use are accounted for in this category. Long duration is defined as any duration longer than 6 months, the current use accounted in this category will be those after the first 6 months.

## Supplementary Appendix C: Risk of AMI, Stroke, and MACE Associated With Current Single or Current Multiple Use of the Study Medications Versus Current Single or Current Multiple Use of LABA

| Endpoint and study medication | Number of events | PY | Crude IR per 1,000 PY (95% CI) | Crude IRR (95% CI) | Adjusteda IRR (95% CI) |
| --- | --- | --- | --- | --- | --- |
| **Current single use** |  |  |  |  |  |
| AMI |  |  |  |  |  |
| LABA | 80 | 8,536 | 9.37 (7.43-11.66) | 1.0 (REF) | 1.0 (REF) |
| Aclidinium | 49 | 4,679 | 10.47 (7.75-13.85) | 1.12 (0.78-1.59) | 1.06 (0.72-1.54) |
| Aclidinium/formoterol | 33 | 3,469 | 9.51 (6.55-13.36) | 1.02 (0.68-1.52) | 1.03 (0.60-1.77) |
| Tiotropium | 387 | 35,648 | 10.86 (9.80-11.99) | 1.16 (0.91-1.47) | 1.09 (0.85-1.39) |
| Other LAMA | 100 | 9,843 | 10.16 (8.27-12.36) | 1.08 (0.81-1.45) | 0.95 (0.68-1.32) |
| LAMA/LABA | 168 | 13,461 | 12.48 (10.66-14.52) | 1.33 (1.02-1.74) | 1.22 (0.82-1.80) |
| LABA/ICS | 645 | 63,375 | 10.18 (9.41-10.99) | 1.09 (0.86-1.37) | 1.12 (0.88-1.41) |
| Stroke |  |  |  |  |  |
| LABA | 61 | 8,526 | 7.15 (5.47-9.19) | 1.0 (REF) | 1.0 (REF) |
| Aclidinium | 27 | 4,673 | 5.78 (3.81-8.41) | 0.81 (0.51-1.27) | 0.78 (0.49-1.24) |
| Aclidinium/formoterol | 14 | 3,477 | 4.03 (2.20-6.75) | 0.56 (0.31-1.01) | 0.51 (0.28-0.94) |
| Tiotropium | 261 | 35,662 | 7.32 (6.46-8.26) | 1.02 (0.77-1.35) | 1.00 (0.75-1.34) |
| Other LAMA | 64 | 9,806 | 6.53 (5.03-8.33) | 0.91 (0.64-1.30) | 0.87 (0.60-1.24) |
| LAMA/LABA | 100 | 13,460 | 7.43 (6.04-9.04) | 1.04 (0.76-1.43) | 0.93 (0.67-1.31) |
| LABA/ICS | 444 | 63,401 | 7.00 (6.37-7.69) | 0.98 (0.75-1.28) | 0.99 (0.75-1.30) |
| MACE |  |  |  |  |  |
| LABA | 138 | 8,472 | 16.29 (13.68-19.24) | 1.0 (REF) | 1.0 (REF) |
| Aclidinium | 75 | 4,649 | 16.13 (12.69-20.22) | 0.99 (0.75-1.31) | 0.94 (0.70-1.27) |
| Aclidinium/formoterol | 47 | 3,454 | 13.61 (10.00-18.09) | 0.84 (0.60-1.16) | 0.84 (0.54-1.31) |
| Tiotropium | 637 | 35,371 | 18.01 (16.64-19.46) | 1.11 (0.92-1.33) | 1.06 (0.88-1.29) |
| Other LAMA | 161 | 9,764 | 16.49 (14.04-19.24) | 1.01 (0.81-1.27) | 1.00 (0.77-1.29) |
| LAMA/LABA | 262 | 13,388 | 19.57 (17.27-22.09) | 1.20 (0.98-1.48) | 1.15 (0.84-1.56) |
| LABA/ICS | 1,069 | 62,851 | 17.01 (16.00-18.06) | 1.04 (0.87-1.25) | 1.07 (0.89-1.28) |
| **Current multiple use** |  |  |  |  |  |
| AMI |  |  |  |  |  |
| LABA | 64 | 5,144 | 12.44 (9.58-15.89) | 1.33 (0.96-1.84) | 1.14 (0.80-1.63) |
| Aclidinium | 94 | 9,223 | 10.19 (8.24-12.47) | 1.09 (0.81-1.47) | 1.13 (0.73-1.73) |
| Aclidinium/formoterol | < 5* | NR* | NR* | NR* | NR* |
| Tiotropium | 580 | 49,720 | 11.67 (10.74-12.65) | 1.24 (0.99-1.57) | 1.16 (0.90-1.50) |
| Other LAMA | 218 | 16,965 | 12.85 (11.20-14.67) | 1.37 (1.06-1.77) | 1.08 (0.76-1.53) |
| LAMA/LABA | 19 | 1,565 | 12.14 (7.31-18.96) | 1.30 (0.79-2.14) | 1.07 (0.55-2.10) |
| LABA/ICS | 647 | 54,770 | 11.81 (10.92-12.76) | 1.26 (1.00-1.59) | 1.09 (0.85-1.39) |
| Stroke |  |  |  |  |  |
| LABA | 32 | 5,156 | 6.21 (4.24-8.76) | 0.87 (0.57-1.33) | 0.69 (0.44-1.08) |
| Aclidinium | 56 | 9,229 | 6.07 (4.58-7.88) | 0.85 (0.59-1.22) | 0.82 (0.52-1.29) |
| Aclidinium/formoterol | 5 | 459 | 10.89 (3.53-25.40) | 1.52 (0.61-3.79) | 1.04 (0.40-2.72) |
| Tiotropium | 326 | 49,802 | 6.55 (5.85-7.30) | 0.91 (0.70-1.20) | 0.85 (0.64-1.14) |
| Other LAMA | 107 | 16,986 | 6.30 (5.16-7.61) | 0.88 (0.64-1.21) | 0.79 (0.54-1.15) |
| LAMA/LABA | 8 | 1,563 | 5.12 (2.21-10.08) | 0.72 (0.34-1.49) | 0.45 (0.20-1.01) |
| LABA/ICS | 357 | 54,880 | 6.51 (5.85-7.22) | 0.91 (0.69-1.19) | 0.86 (0.65-1.15) |
| MACE |  |  |  |  |  |
| LABA | 96 | 5,111 | 18.78 (15.21-22.94) | 1.15 (0.89-1.50) | 0.91 (0.69-1.21) |
| Aclidinium | 146 | 9,162 | 15.94 (13.46-18.74) | 0.98 (0.78-1.23) | 0.99 (0.70-1.38) |
| Aclidinium/formoterol | 6 | 459 | 13.09 (4.80-28.48) | 0.80 (0.35-1.82) | 0.63 (0.25-1.54) |
| Tiotropium | 886 | 49,335 | 17.96 (16.80-19.18) | 1.10 (0.92-1.32) | 1.03 (0.84-1.26) |
| Other LAMA | 323 | 16,864 | 19.15 (17.12-21.36) | 1.18 (0.96-1.44) | 0.98 (0.74-1.30) |
| LAMA/LABA | 27 | 1,561 | 17.30 (11.40-25.17) | 1.06 (0.70-1.60) | 0.82 (0.47-1.42) |
| LABA/ICS | 986 | 54,298 | 18.16 (17.04-19.33) | 1.11 (0.93-1.33) | 0.97 (0.81-1.17) |

AMI = acute myocardial infarction; CHD = coronary heart disease; CI = confidence interval; COPD = chronic obstructive pulmonary disease; ICS = inhaled corticosteroid; IR = incidence rate; IRR = incidence rate ratio; LABA = long-acting beta2-agonist; LAMA = long-acting anticholinergic; MACE = major adverse cardiovascular events; NR = not reported; PY = person-years; REF = reference category.

The number of events and person-years for current use of LABA (reference category) differed across the study medications. Current users of both LABA and the specific study medication of interest were excluded from each corresponding analysis. *Exact counts are redacted per the Clinical Practice Research Datalink small cell count policy.  aFor AMI, the models were adjusted by age; sex; COPD severity; calendar year at index date; smoking history; history of CHD; asthma; heart failure; number of prescriptions for respiratory medications in the 12 months prior to the start date; and use of LABA /ICS, LAMA/LABA, ICS, mucolytics, lipid-lowering drugs, beta-blockers, and vaccines in the 12 months prior to the start date. For stroke, the models were adjusted by age; sex; COPD severity; history of cerebrovascular disease; arrhythmias; asthma; heart failure; number of prescriptions for respiratory medications in the 12 months prior to the start date; and use of LABA, mucolytics, and oral glucocorticoids in the 12 months prior to the start date. For MACE, the models were adjusted by age; sex; COPD severity; calendar year at index date; smoking history; history of CHD; cerebrovascular disease; arrhythmias; heart failure; asthma; number of prescriptions for respiratory medications in the 12 months prior to the start date; and prior use of LABA, LABA/ICS, LAMA/LABA, ICS, mucolytics, oral glucocorticoids, beta-blockers, lipid-lowering drugs, and vaccines in the 12 months prior to the start date.

## Supplementary Appendix D: Crude Incidence Rate and Crude and Adjusted Incidence Rate Ratios of AMI, Stroke, and MACE Comparing Recent and Past Use of Each Study Medication With Current Use of LABA

| Recent/Past Use | Number of Events | PY | Crude Incidence Rate per 1,000 PY (95% CI) | Crude Incidence Rate Ratio (95% CI) | Adjusted Incidence Rate Ratioa (95% CI) |
| --- | --- | --- | --- | --- | --- |
| **AMI** |  |  |  |  |  |
| Recent use |  |  |  |  |  |
| LABA | 54 | 4,810 | 11.23 (8.43-14.65) | 1.0 (REF) | 1.0 (REF) |
| Aclidinium | 34 | 3,352 | 10.14 (7.03-14.18) | 0.90 (0.59-1.39) | 0.92 (0.57-1.50) |
| Aclidinium/formoterol | 14 | 1,002 | 13.97 (7.64-23.45) | 1.24 (0.69-2.24) | 1.01 (0.49-2.05) |
| Tiotropium | 247 | 19,521 | 12.65 (11.12-14.33) | 1.13 (0.84-1.51) | 1.01 (0.74-1.37) |
| Other LAMA | 64 | 5,159 | 12.40 (9.55-15.84) | 1.11 (0.77-1.59) | 0.93 (0.61-1.43) |
| LAMA/LABA | 32 | 2,896 | 11.05 (7.56-15.60) | 0.98 (0.64-1.52) | 0.87 (0.48-1.55) |
| LABA/ICS | 362 | 31,210 | 11.60 (10.43-12.86) | 1.03 (0.78-1.38) | 1.05 (0.78-1.40) |
| Past use |  |  |  |  |  |
| LABA | 264 | 24,746 | 10.67 (9.42-12.04) | 1.0 (REF) | 1.0 (REF) |
| Aclidinium | 168 | 12,483 | 13.46 (11.50-15.65) | 1.26 (1.04-1.53) | 1.09 (0.88-1.36) |
| Aclidinium/formoterol | 35 | 3,122 | 11.21 (7.81-15.59) | 1.05 (0.74-1.50) | 0.81 (0.53-1.22) |
| Tiotropium | 689 | 59,326 | 11.61 (10.76-12.51) | 1.09 (0.94-1.25) | 1.01 (0.87-1.17) |
| Other LAMA | 183 | 15,911 | 11.50 (9.90-13.29) | 1.08 (0.89-1.30) | 0.94 (0.76-1.18) |
| LAMA/LABA | 65 | 7,243 | 8.97 (6.93-11.44) | 0.84 (0.64-1.10) | 0.72 (0.51-1.01) |
| LABA/ICS | 558 | 49,336 | 11.31 (10.39-12.29) | 1.06 (0.92-1.23) | 1.05 (0.91-1.22) |
| **Stroke** |  |  |  |  |  |
| Recent use |  |  |  |  |  |
| LABA | 31 | 4,817 | 6.43 (4.37-9.13) | 1.0 (REF) | 1.0 (REF) |
| Aclidinium | 36 | 3,343 | 10.77 (7.54-14.91) | 1.67 (1.04-2.71) | 1.79 (1.06-3.00) |
| Aclidinium/formoterol | 7 | 1,003 | 6.98 (2.81-14.38) | 1.08 (0.48-2.46) | 1.18 (0.50-2.74) |
| Tiotropium | 157 | 19,552 | 8.03 (6.82-9.39) | 1.25 (0.85-1.83) | 1.23 (0.83-1.83) |
| Other LAMA | 51 | 5,156 | 9.89 (7.37-13.01) | 1.54 (0.98-2.40) | 1.55 (0.96-2.49) |
| LAMA/LABA | 21 | 2,895 | 7.25 (4.49-11.09) | 1.13 (0.65-1.96) | 1.12 (0.63-2.01) |
| LABA/ICS | 268 | 31,244 | 8.58 (7.58-9.67) | 1.33 (0.92-1.93) | 1.36 (0.94-1.99) |
| Past use |  |  |  |  |  |
| LABA | 175 | 24,795 | 7.06 (6.05-8.18) | 1.0 (REF) | 1.0 (REF) |
| Aclidinium | 84 | 12,537 | 6.70 (5.34-8.30) | 0.95 (0.73-1.23) | 0.92 (0.70-1.20) |
| Aclidinium/formoterol | 17 | 3,130 | 5.43 (3.16-8.70) | 0.77 (0.47-1.27) | 0.72 (0.43-1.19) |
| Tiotropium | 484 | 59,425 | 8.14 (7.44-8.90) | 1.15 (0.97-1.37) | 1.08 (0.91-1.29) |
| Other LAMA | 126 | 15,933 | 7.91 (6.59-9.42) | 1.12 (0.89-1.41) | 1.07 (0.84-1.35) |
| LAMA/LABA | 52 | 7,242 | 7.18 (5.36-9.42) | 1.02 (0.75-1.39) | 0.97 (0.70-1.33) |
| LABA/ICS | 385 | 49,378 | 7.80 (7.04-8.62) | 1.10 (0.92-1.32) | 1.07 (0.89-1.28) |
| **MACE** |  |  |  |  |  |
| Recent use |  |  |  |  |  |
| LABA | 84 | 4,777 | 17.58 (14.02-21.77) | 1.0 (REF) | 1.0 (REF) |
| Aclidinium | 68 | 3,322 | 20.47 (15.89-25.95) | 1.16 (0.85-1.60) | 1.25 (0.87-1.80) |
| Aclidinium/formoterol | 21 | 997 | 21.06 (13.04-32.20) | 1.20 (0.74-1.93) | 1.04 (0.58-1.85) |
| Tiotropium | 396 | 19,345 | 20.47 (18.50-22.59) | 1.16 (0.92-1.47) | 1.08 (0.85-1.39) |
| Other LAMA | 112 | 5,118 | 21.88 (18.02-26.33) | 1.24 (0.94-1.65) | 1.11 (0.79-1.55) |
| LAMA/LABA | 52 | 2,880 | 18.05 (13.48-23.68) | 1.03 (0.73-1.45) | 0.92 (0.58-1.45) |
| LABA/ICS | 613 | 30,943 | 19.81 (18.27-21.44) | 1.13 (0.90-1.42) | 1.14 (0.90-1.44) |
| Past use |  |  |  |  |  |
| LABA | 424 | 24,410 | 17.37 (15.76-19.10) | 1.0 (REF) | 1.0 (REF) |
| Aclidinium | 250 | 12,349 | 20.24 (17.81-22.92) | 1.17 (1.00-1.36) | 1.06 (0.89-1.26) |
| Aclidinium/formoterol | 50 | 3,101 | 16.13 (11.97-21.26) | 0.93 (0.69-1.24) | 0.77 (0.54-1.08) |
| Tiotropium | 1,129 | 58,535 | 19.29 (18.18-20.45) | 1.11 (0.99-1.24) | 1.02 (0.91-1.15) |
| Other LAMA | 300 | 15,747 | 19.05 (16.96-21.33) | 1.10 (0.95-1.27) | 0.98 (0.82-1.16) |
| LAMA/LABA | 115 | 7,184 | 16.01 (13.22-19.22) | 0.92 (0.75-1.13) | 0.82 (0.63-1.07) |
| LABA/ICS | 918 | 48,758 | 18.83 (17.63-20.09) | 1.08 (0.97-1.22) | 1.07 (0.95-1.20) |

CI = confidence interval; COPD = chronic obstructive pulmonary disease; ICS = inhaled corticosteroids; LABA = long-acting beta-agonist; LAMA = long-acting anticholinergics; MACE = major adverse cardiac events; PY = person-years; REF = reference.

a Adjusted by age; sex; COPD severity; calendar period; smoking history; history of ischemic heart disease, asthma, and heart failure; number of prescriptions for respiratory medications in the 12 months prior to start date; and use of LABA /ICS, LAMA/LABA, ICS, mucolytics, lipid-lowering drugs, beta-blockers, and vaccines in the 12 months prior to start date.

## Supplementary Appendix E: Crude Incidence Rate and Crude and Adjusted Incidence Rate Ratio of AMI, Stroke, and MACE Comparing Current Use of Each Study Medication With Current Use of LABA, by Short and Long Duration of Current Use

| Short and Long Duration of Current Usea | Number of Events | PY | Crude Incidence Rate per 1,000 PY (95% CI) | Crude Incidence Rate Ratio (95% CI) | Adjusted Incidence Rate Ratiob (95% CI) |
| --- | --- | --- | --- | --- | --- |
| **AMI** |  |  |  |  |  |
| Short duration of current use |  |  |  |  |  |
| LABA | 68 | 4,909 | 13.85 (10.76-17.56) | 1.0 (REF) | 1.0 (REF) |
| Aclidinium | 55 | 4,144 | 13.27 (10.00-17.28) | 0.96 (0.67-1.37) | 0.92 (0.61-1.38) |
| Aclidinium/formoterol | 20 | 1,683 | 11.88 (7.26-18.35) | 0.86 (0.52-1.41) | 0.95 (0.52-1.74) |
| Tiotropium | 302 | 22,457 | 13.45 (11.97-15.05) | 0.97 (0.75-1.26) | 0.93 (0.71-1.22) |
| Other LAMA | 131 | 9,227 | 14.20 (11.87-16.85) | 1.02 (0.76-1.37) | 0.84 (0.59-1.19) |
| LAMA/LABA | 82 | 6,422 | 12.77 (10.16-15.85) | 0.92 (0.67-1.27) | 0.88 (0.56-1.38) |
| LABA/ICS | 374 | 29,598 | 12.64 (11.39-13.98) | 0.91 (0.70-1.18) | 0.89 (0.68-1.15) |
| Long duration of current use |  |  |  |  |  |
| LABA | 76 | 8,772 | 8.66 (6.83-10.84) | 1.0 (REF) | 1.0 (REF) |
| Aclidinium | 88 | 9,758 | 9.02 (7.23-11.11) | 1.04 (0.77-1.41) | 1.11 (0.78-1.60) |
| Aclidinium/formoterol | 14 | 2,246 | 6.23 (3.41-10.46) | 0.72 (0.41-1.27) | 1.04 (0.50-2.19) |
| Tiotropium | 665 | 62,911 | 10.57 (9.78-11.41) | 1.22 (0.96-1.55) | 1.20 (0.94-1.53) |
| Other LAMA | 187 | 17,581 | 10.64 (9.17-12.27) | 1.23 (0.94-1.60) | 1.22 (0.89-1.66) |
| LAMA/LABA | 105 | 8,604 | 12.20 (9.98-14.77) | 1.41 (1.05-1.89) | 1.68 (1.10-2.55) |
| LABA/ICS | 918 | 88,548 | 10.37 (9.71-11.06) | 1.20 (0.95-1.51) | 1.18 (0.93-1.49) |
| **Stroke** |  |  |  |  |  |
| Short duration of current use |  |  |  |  |  |
| LABA | 35 | 4,911 | 7.13 (4.96-9.91) | 1.0 (REF) | 1.0 (REF) |
| Aclidinium | 31 | 4,143 | 7.48 (5.08-10.62) | 1.05 (0.65-1.70) | 1.01 (0.61-1.67) |
| Aclidinium/formoterol | 8 | 1,685 | 4.75 (2.05-9.36) | 0.67 (0.31-1.44) | 0.63 (0.29-1.39) |
| Tiotropium | 174 | 22,469 | 7.74 (6.64-8.98) | 1.09 (0.76-1.56) | 1.04 (0.72-1.50) |
| Other LAMA | 66 | 9,225 | 7.15 (5.53-9.10) | 1.00 (0.67-1.51) | 0.97 (0.63-1.48) |
| LAMA/LABA | 40 | 6,422 | 6.23 (4.45-8.48) | 0.87 (0.56-1.38) | 0.79 (0.49-1.25) |
| LABA/ICS | 239 | 29,612 | 8.07 (7.08-9.16) | 1.13 (0.79-1.61) | 1.03 (0.72-1.48) |
| Long duration of current use |  |  |  |  |  |
| LABA | 58 | 8,771 | 6.61 (5.02-8.55) | 1.0 (REF) | 1.0 (REF) |
| Aclidinium | 52 | 9,759 | 5.33 (3.98-6.99) | 0.81 (0.55-1.17) | 0.79 (0.52-1.18) |
| Aclidinium/formoterol | 11 | 2,252 | 4.88 (2.44-8.74) | 0.74 (0.39-1.41) | 0.64 (0.33-1.23) |
| Tiotropium | 413 | 62,994 | 6.56 (5.94-7.22) | 0.99 (0.75-1.31) | 1.00 (0.76-1.32) |
| Other LAMA | 105 | 17,568 | 5.98 (4.89-7.24) | 0.90 (0.66-1.25) | 0.84 (0.60-1.18) |
| LAMA/LABA | 68 | 8,601 | 7.91 (6.14-10.02) | 1.20 (0.84-1.70) | 1.07 (0.75-1.54) |
| LABA/ICS | 562 | 88,669 | 6.34 (5.82-6.88) | 0.96 (0.73-1.26) | 1.02 (0.78-1.34) |
| **MACE** |  |  |  |  |  |
| Short duration of current use |  |  |  |  |  |
| LABA | 103 | 4,901 | 21.02 (17.16-25.49) | 1.0 (REF) | 1.0 (REF) |
| Aclidinium | 86 | 4,134 | 20.80 (16.64-25.69) | 0.99 (0.74-1.32) | 0.90 (0.65-1.24) |
| Aclidinium/formoterol | 28 | 1,681 | 16.66 (11.07-24.07) | 0.79 (0.52-1.20) | 0.92 (0.55-1.52) |
| Tiotropium | 471 | 22,407 | 21.02 (19.16-23.01) | 1.00 (0.81-1.24) | 0.97 (0.77-1.21) |
| Other LAMA | 197 | 9,208 | 21.40 (18.51-24.60) | 1.02 (0.80-1.29) | 0.93 (0.70-1.24) |
| LAMA/LABA | 120 | 6,412 | 18.71 (15.52-22.38) | 0.89 (0.68-1.16) | 0.86 (0.60-1.23) |
| LABA/ICS | 606 | 29,535 | 20.52 (18.92-22.22) | 0.98 (0.79-1.20) | 0.93 (0.76-1.16) |
| Long duration of current use |  |  |  |  |  |
| LABA | 131 | 8,683 | 15.09 (12.61-17.90) | 1.0 (REF) | 1.0 (REF) |
| Aclidinium | 135 | 9,676 | 13.95 (11.70-16.51) | 0.92 (0.73-1.18) | 0.99 (0.74-1.31) |
| Aclidinium/formoterol | 25 | 2,232 | 11.20 (7.25-16.54) | 0.74 (0.48-1.14) | 0.96 (0.55-1.69) |
| Tiotropium | 1,052 | 62,300 | 16.89 (15.88-17.94) | 1.12 (0.93-1.34) | 1.12 (0.93-1.35) |
| Other LAMA | 287 | 17,420 | 16.48 (14.62-18.50) | 1.09 (0.89-1.34) | 1.12 (0.87-1.42) |
| LAMA/LABA | 169 | 8,536 | 19.80 (16.93-23.02) | 1.31 (1.04-1.65) | 1.68 (1.20-2.36) |
| LABA/ICS | 1,449 | 87,614 | 16.54 (15.70-17.41) | 1.10 (0.92-1.31) | 1.11 (0.93-1.33) |

CI = confidence interval; COPD = chronic obstructive pulmonary disease; ICS = inhaled corticosteroids; LABA = long-acting beta-agonist; LAMA = long-acting anticholinergics; MACE = major adverse cardiovascular events; PY = person-years; REF = reference.

a Short duration was considered when duration of use was shorter than or equal to 6 months of the specific study medication. Long duration was defined as any duration longer than 6 months.

b Adjusted by age; sex; COPD severity; calendar period; smoking history; history of ischemic heart disease, asthma, and heart failure; number of prescriptions for respiratory medications in the 12 months prior to start date; and use of LABA/ICS, LAMA/LABA, ICS, mucolytics, lipid-lowering drugs, beta-blockers, and vaccines in the 12 months prior to start date.

## Supplementary Appendix F: Adjusted Incidence Rate Ratios for AMI and Stroke Comparing Current Use of Aclidinium Bromide and Current Use of Aclidinium/Formoterol With Current Use of LABA, Main Analysis and Adjusted by Propensity Score Deciles Before and After Trimming

| Current use | AMI Incidence rate ratio (95% CI) | Stroke Incidence rate ratio (95% CI) |
| --- | --- | --- |
| Main analysis |  |  |
| LABA | 1.0 (REF) | 1.0 (REF) |
| Aclidinium | 1.00 (0.76-1.31) | 0.86 (0.62-1.18) |
| Aclidinium/formoterol | 0.95 (0.60-1.52) | 0.64 (0.39-1.06) |
| PS-adjusted analysis before trimming |  |  |
| LABA | 1.0 (REF) | 1.0 (REF) |
| Aclidinium | 0.93 (0.72-1.20) | 0.83 (0.60-1.15) |
| LABA | 1.0 (REF) | 1.0 (REF) |
| Aclidinium/formoterol | 0.80 (0.54-1.20) | 0.67 (0.40-1.13) |
| PS-adjusted analysis after trimming |  |  |
| LABA | 1.0 (REF) | 1.0 (REF) |
| Aclidinium | 0.90 (0.69-1.17) | 0.78 (0.56-1.08) |
| LABA | 1.0 (REF) | 1.0 (REF) |
| Aclidinium/formoterol | 0.82 (0.55-1.22) | 0.68 (0.40-1.14) |

AMI = acute myocardial infarction; CI = confidence interval; LABA = long-acting beta2-agonist; PS = propensity score; REF = reference category.
